# Supplementary material
Source: Springer Nature journal article supplement (https://www.springermedizin.de/resource/supplementary/13058_2011_2962_MOESM1_ESM.pdf/9702926)

**A**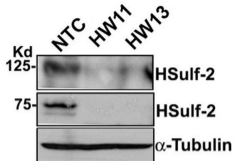**B**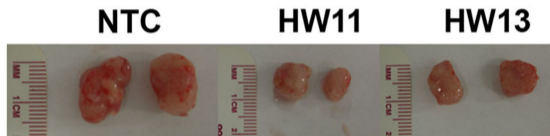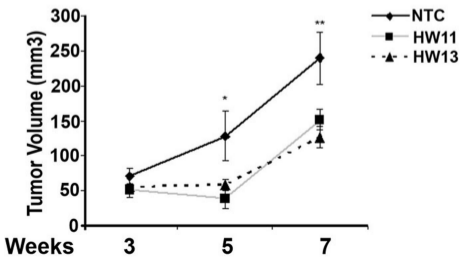

Supplement: MOESM1 [file 9702926]
